# Supplementary material
Source: PubMed Central journal article supplement (PMC1482520)

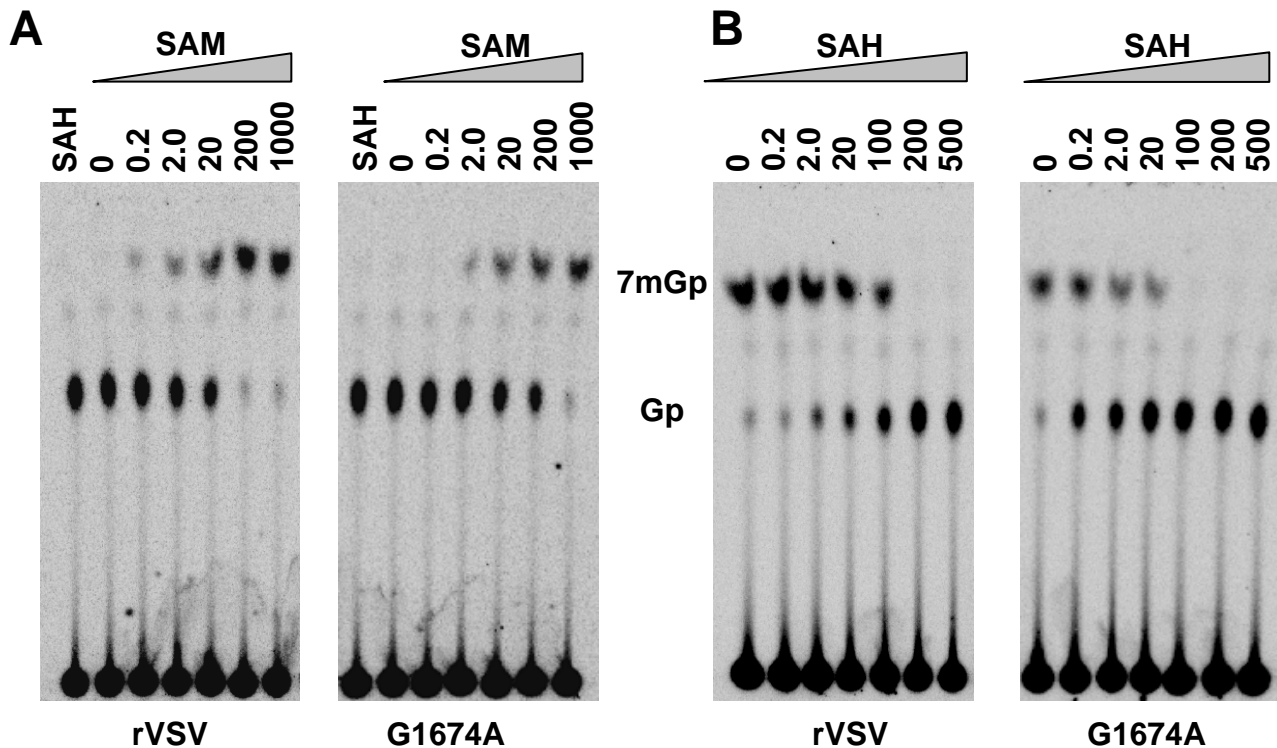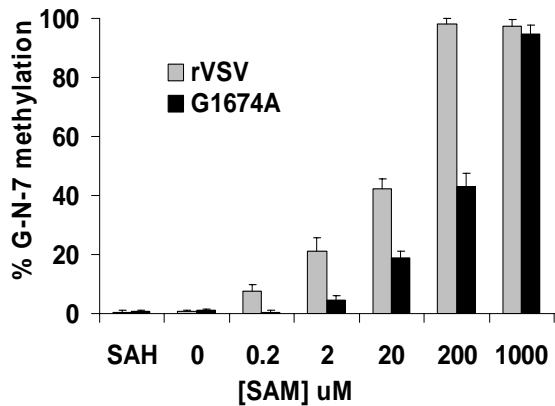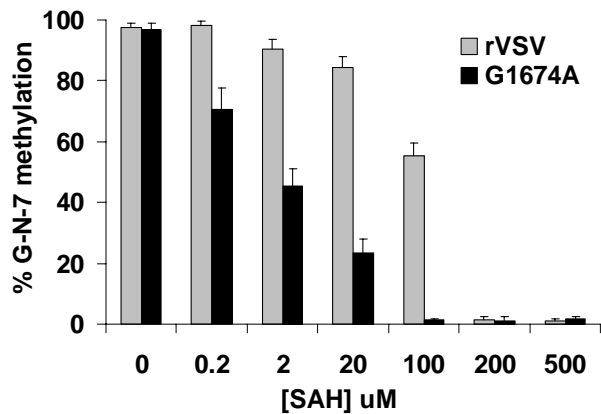

Supplement: pnas_0509821103_1.pdf [file pnas_0509821103_1.pdf]

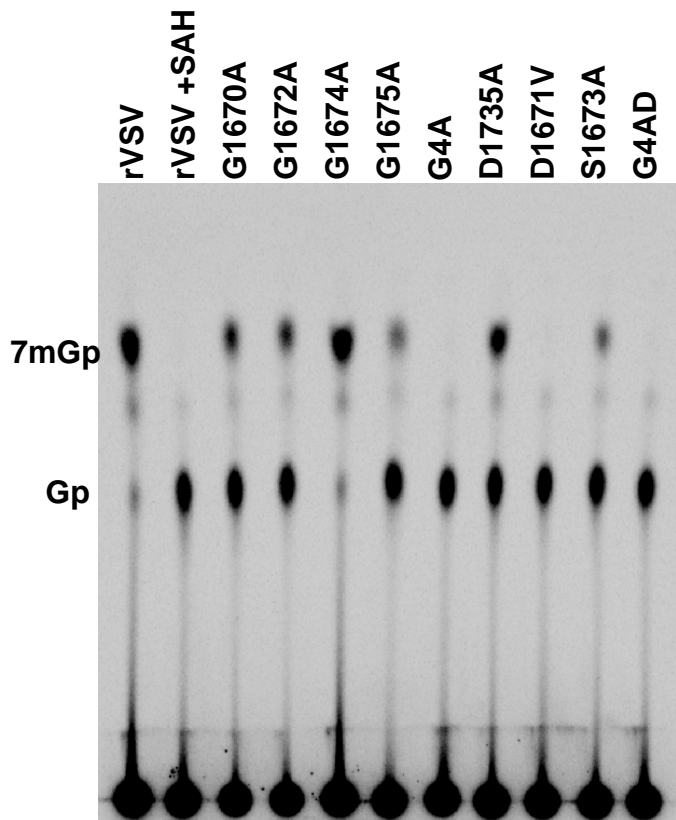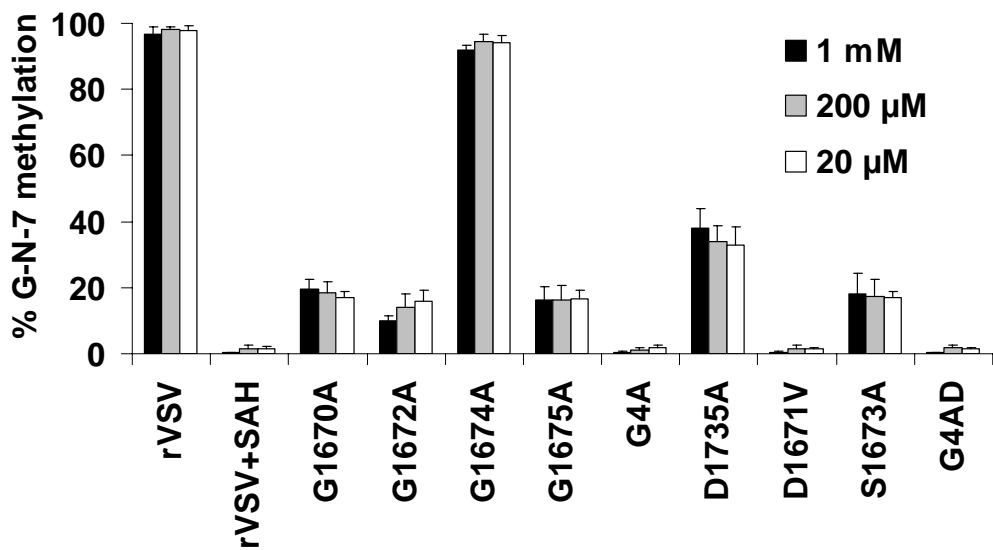

Supplement: pnas_0509821103_2.pdf [file pnas_0509821103_2.pdf]

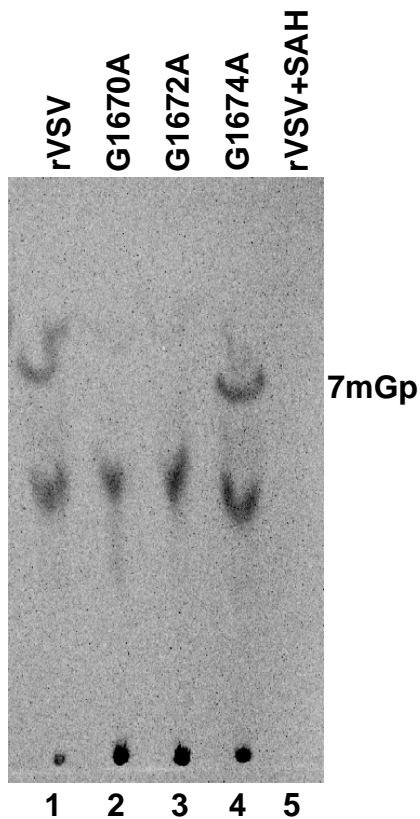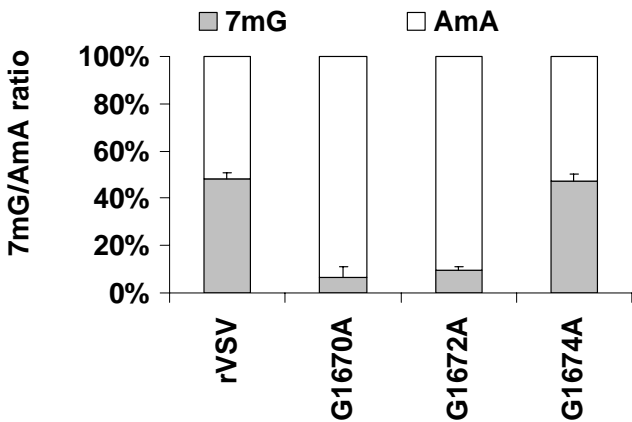

Supplement: pnas_0509821103_3.pdf [file pnas_0509821103_3.pdf]
